# Supplementary material
Source: Research Square preprint supplement (doi:10.21203/rs.3.rs-8853409/v1)
Supplement: Supplementary file 1 [file 7285267ce9c166544fa4b902.docx]

**Extended Data Table 1: Blood gas measurements.** Measurements of pH, pCO2, pO2, and total hemoglobin (tHb) in the arterial blood at two timepoints throughout the experiment, and absolute value of the difference between measurements at each timepoint. Mean +/- standard deviation. For ascending (<) stim C2HS, descending (>) stim C2HS, sham C2HS, intact, and sham intact rats, time 1 corresponds to just prior to the first bout of stimulus/sham, while time 2 corresponds to just prior to the second bout of stimulus sham. For the transection group, time 1 corresponds to just prior to stimulation after hemisection, and time 2 corresponds to just prior to stimulation after transection. For the intrathecal PTX and sham groups, time 1 is just prior to stimulation before drug administration, and time 2 is just prior to stimulation after drug administration. Respiratory set point varied from rat to rat. As such, ventilator parameters were adjusted to keep pCO2 below 50 mmHg while minimizing differences between time 1 and time 2 to improve comparisons of stimulation timing/injury/drug administration within rat. While intra-rat variability from measurement to measurement remained low, hemisected rats tended to have a higher pCO2 setpoint vs. intact rats.

|  | < Stim C2HS | > Stim C2HS | Sham C2HS | Intact | Sham Intact | Transection | Intrathecal PTX | Intrathecal Sham |
| --- | --- | --- | --- | --- | --- | --- | --- | --- |
| Time 1 |  |  |  |  |  |  |  |  |
| pH | 7.341 +/- 0.036 | 7.366 +/- 0.026 | 7.34 +/- 0.039 | 7.379 +/- 0.018 | 7.365 +/- 0.013 | 7.332 +/- 0.028 | 7.338 +/- 0.030 | 7.365 +/- 0.045 |
| pCO2 (mmHg) | 45.0 +/- 4.3 | 42.6 +/- 2.8 | 46.5 +/- 4.3 | 40.6 +/- 2.5 | 39.5 +/- 3.6 | 43.7 +/- 5.6 | 38.7 +/- 3.2 | 43.4 +/- 5.6 |
| pO2 (mmHg) | 131.4 +/- 24.0 | 147.8 +/- 16.5 | 136.1 +/- 15.0 | 149.4 +/- 18.9 | 146.4 +/- 15.0 | 155.6 +/- 22.8 | 147.3 +/- 20.9 | 131.6 +/- 36.6 |
| tHb (g/dL) | 13.3 +/- 0.8 | 14.0 +/- 0.8 | 14.4 +/- 0.4 | 13.6 +/- 0.7 | 13.6 +/- 1.2 | 13.0 +/- 2.0 | 13.0 +/- 2.1 | 12.7 +/- 2.5 |
| Time 2 |  |  |  |  |  |  |  |  |
| pH | 7.340 +/- 0.033 | 7.376 +/- 0.032 | 7.328 +/- 0.038 | 7.394 +/- 0.021 | 7.361 +/- 0.015 | 7.335 +/- 0.042 | 7.395 +/- 0.053 | 7.405 +/- 0.042 |
| pCO2 (mmHg) | 43.7 +/- 6.3 | 40.7 +/- 5.3 | 46.9 +/- 4.7 | 38.7 +/- 3.0 | 41.3 +/- 2.7 | 43.0 +/- 6.3 | 38.4 +/- 6.5 | 40.8 +/- 6.1 |
| pO2 (mmHg) | 124.9 +/- 23.8 | 142.7 +/- 21.9 | 125.9 +/- 10.9 | 158.1 +/- 10.7 | 133.3 +/- 20.1 | 179.0 +/- 9.8 | 166.6 +/- 25.2 | 139.5 +/- 28.0 |
| tHb (g/dL) | 13.0 +/- 1.3 | 14.1 +/- 1.6 | 14.4 +/- 1.0 | 13.9 +/- 1.1 | 13.5 +/- 0.7 | 14.2 +/- 0.8 | 13.9 +/- 1.0 | 14.1 +/- 1.0 |
| Abs. Δ 1-2 |  |  |  |  |  |  |  |  |
| pH | 0.019 +/- 0.014 | 0.027 +/- 0.024 | 0.016 +/- 0.009 | 0.018 +/- 0.015 | 0.010 +/- 0.005 | 0.036 +/- 0.017 | 0.051 +/- 0.020 | 0.051 +/- 0.052 |
| pCO2 (mmHg) | 2.5 +/- 3.2 | 4.2 +/- 4.5 | 2.6 +/- 1.7 | 3.1 +/- 1.6 | 2.8 +/- 2.8 | 7.9 +/- 2.4 | 4.9 +/- 3.1 | 6.1 +/- 5.6 |
| pO2 (mmHg) | 16.9 +/- 9.1 | 13.7 +/- 5.8 | 20.5 +/- 5.9 | 16.3 +/- 14.2 | 15.2 +/- 13.6 | 25.8 +/- 20.7 | 19.2 +/- 14.5 | 20.8 +/- 11.2 |
| tHb (g/dL) | 0.8 +/- 0.7 | 1.1 +/- 0.8 | 0.8 +/- 0.5 | 0.8 +/- 0.6 | 0.9 +/- 0.4 | 1.7 +/- 1.5 | 1.6 +/- 1.4 | 1.9 +/- 2.0 |

**Extended Data Figure 1: Average stimulation characteristics.**

(A-B) Average number of stimuli per breath at each current level, (C-D) overall frequency across the full respiratory cycle, (E-F) total length of time stimulated, and (G-H) number of breaths stimulated during inspiratory and expiratory phase stimulation. Multiple comparisons show differences at each current level between intact vs ascending current hemisected and descending vs ascending current hemisected. * p < 0.05. ** p < 0.01, *** p < 0.001, **** p < 0.0001. Significant effects not involving group are not listed. As stimulation, particularly during the inspiratory phase, led to disruptions in respiratory rhythms, the total amount of stimulation both in how many stimuli were administered per breath, amount of time stimulus lasted and number of breaths that were stimulated was lower at higher currents in intact rats as compared to the hemisected ascending current group. However, the frequency of stimulation across the respiratory cycle remained relatively constant between groups.

**Extended Data Figure 2: Presentation order of inspiratory and expiratory stimulus bouts has no significant effect on inspiratory EMG output.**

(A) Visual representation of stimulation type/injury and stimulus presentation order depicted below. Change from post-injury baseline of inspiratory diaphragm EMG during stimulation on the (B) ipsilesional and (C) contralesional sides. Change from post-injury baseline of inspiratory diaphragm EMG of the first 30 breaths post stimulation on the (D) ipsilesional and (E) contralesional sides. Change from post-injury baseline of expiratory diaphragm EMG during stimulation on the (F) ipsilesional and (G) contralesional sides. Significant effects not involving stimulus block presentation order are not listed. There were no significant effects of stimulus block presentation order on diaphragm EMG response, nor any interaction of presentation order and stimulus phase or current amplitude.

**Extended Data Figure 3: Representative observations**

(A) Sample traces of diaphragm EMG (top, black) and inspiratory pressure (bottom, gray; red line at neutral pressure) of a urethane anesthetized rat breathing against a closed system. Yellow boxes correspond to the period in which inspiratory pressure is being generated. (B) Sample diaphragm EMG motor evoked potentials and (C) individual traces of motor evoked potentials at currents above (red, 1.85 mA) and below (black, 0.5 mA) that necessary to directly activate the phrenic nerve. Motor evoked potentials were measured by sending single current pulses of increasing amplitude at the beginning of each breath with at least 1 second between each pulse to avoid temporal summation. Each current amplitude was delivered 5 times, and traces represent the average EMG response post stimulus. Note that single current pulses only weakly and inconsistently elicit the ~4 ms response, which only begins at current amplitudes above the 250 µA maximum utilized in this study. Direct phrenic activation at very high current amplitudes leads to a much stronger and consistent response starting at ~2.5 ms from stimulation. All traces taken from rats not part of the current study.

**Extended Data Figure 4: Inspiratory EMG area under the curve increases in response to stimulation similarly to inspiratory EMG peak.**

Change in inspiratory diaphragm EMG area under the curve (AUC) from post injury baseline for the average of (A) all breaths during stimulation and (B) the first 30 breaths post stimulation. Individual responses of inspiratory area under the curve EMG change (C-F) during and (G-J) post stimulation. Note the difference in scale of C-F vs G-J. Asterisks indicate when change in EMG peak was significantly different from zero; * p < 0.05, ** p < 0.01, *** p < 0.001, **** p < 0.0001. EMG area under the curve followed the same response to stimulus as EMG peak.

**Extended Data Figure 5: Residual activity does not require prior exposure to stimulus.**

(A) Sample ipsilesional diaphragm EMG responses from a descending current C2HS rat to the initial 250 µA inspiratory and expiratory phase stimulation bout, showing residual inspiratory diaphragm EMG even after only a single high-amplitude presentation of stimulus. For ascending vs descending stimulus presentation order: change from post injury baseline in ipsilesional diaphragm inspiratory peak (B) during inspiratory phase stimulation, (C) during expiratory phase stimulation, (D) post inspiratory phase stimulation, and (E) post expiratory phase stimulation. Significant effects of current amplitude alone are not listed. Inspiratory ipsilesional peak EMG response was not different during or after stimulation between ascending or descending current amplitude presentation order.

**Extended Data Figure 6: Additional RNAScope representative images.**

(A) Representative C4 cross section of FOS staining (purple) in stimulated and unstimulated injured and intact rats. (B) Representative images of FOS (green) copositivity with VSX2 (red) and RBFOX3 (NeuN - purple). Note that color of FOS changes from panel A to B. All sets of images were taken with identical exposures and uniformly brightened for ease of visualization. Group data of (C) number of VSX2/FOS copositive cells and (D) percentage of FOS positive cells copositive for VSX2.
